# Supplementary material for: Structural basis of transcription inhibition by the DNA mimic protein Ocr of bacteriophage T7
Source: eLife journal article supplement (doi:10.7554/elife.52125), 2020-02-10
Supplement: supp [file elife-52125-supp-v1.zip]

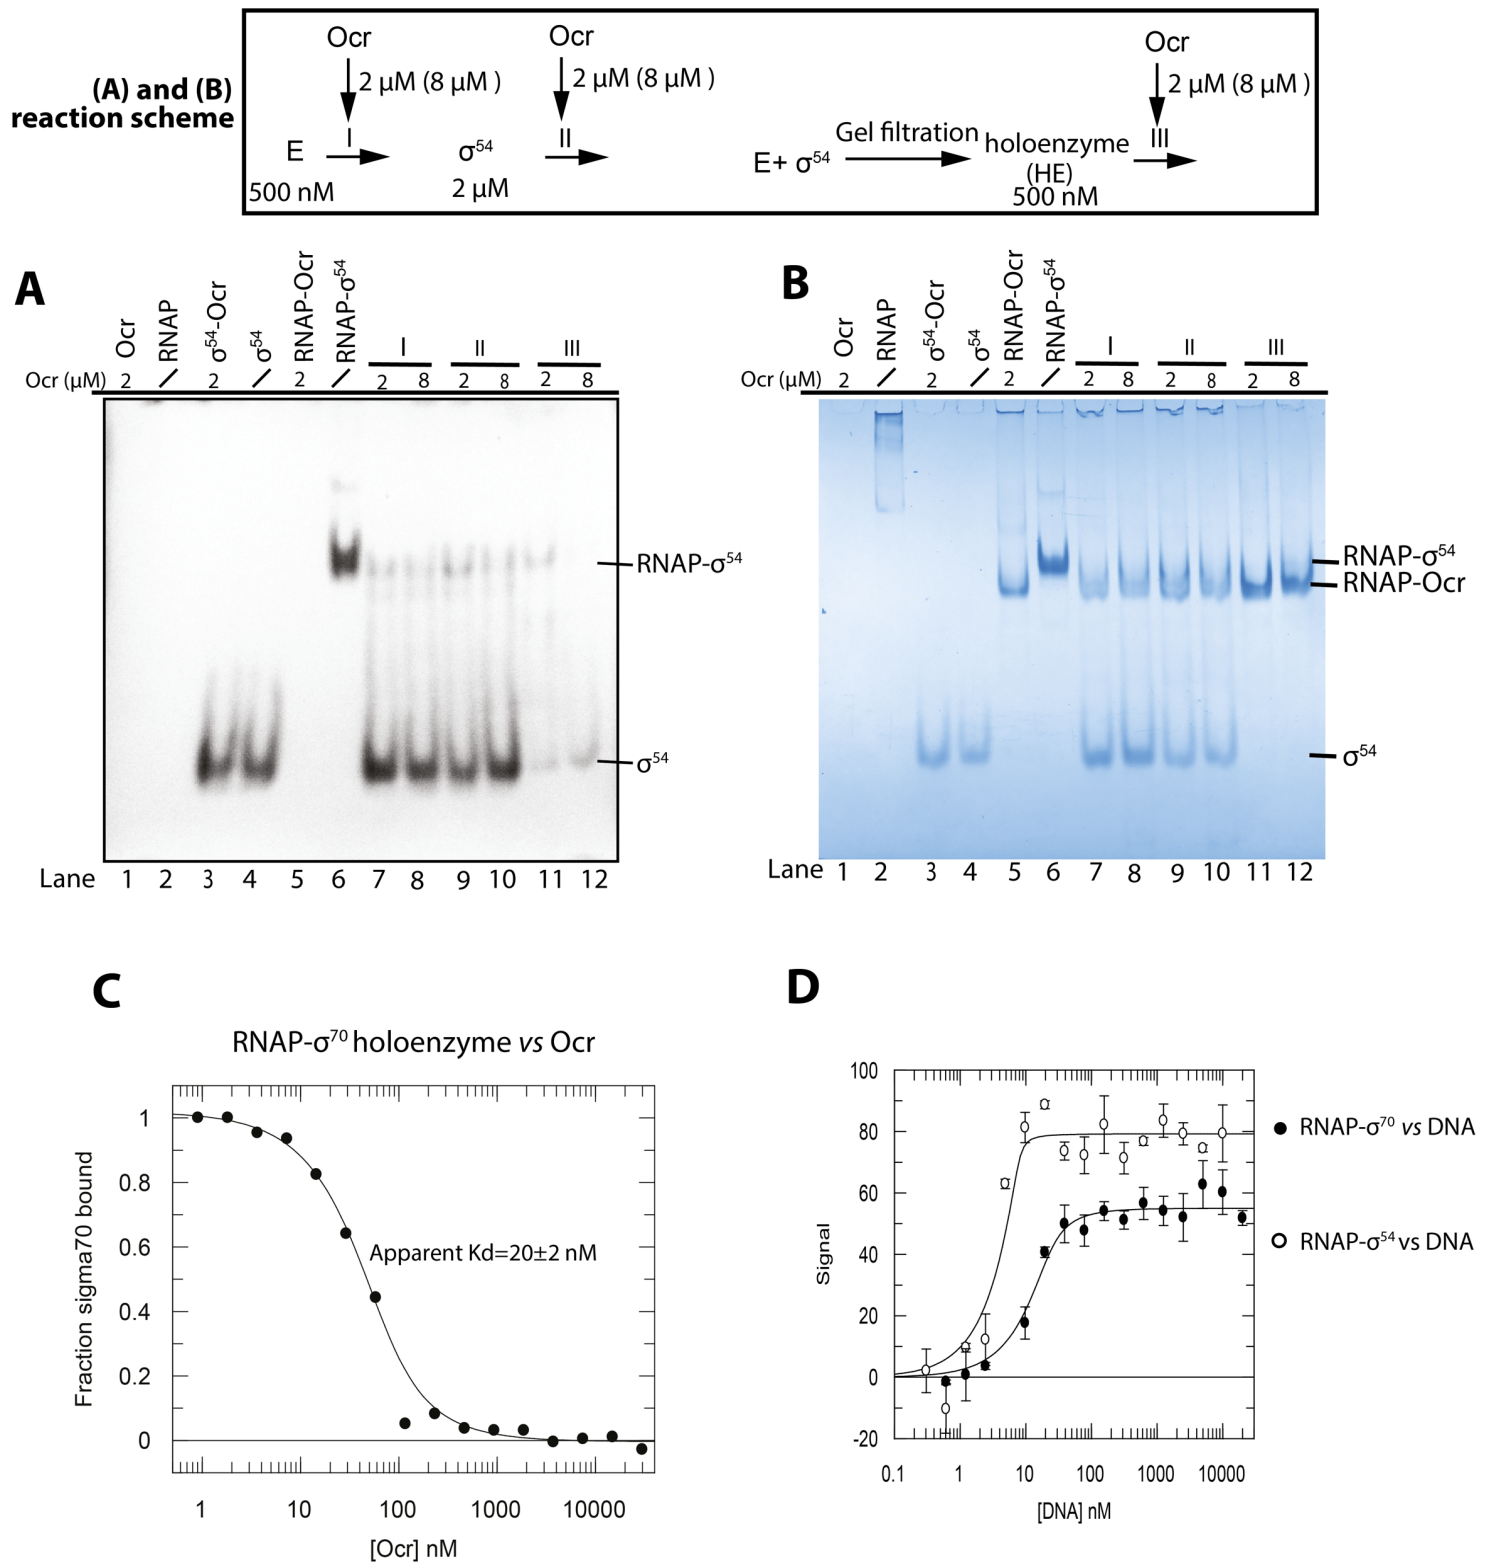

**Figure 6 – figure supplement 1. Ocr interferes with holoenzyme formation of  $\sigma^{54}$**  **A)-B)** Native PAGE gels. **A)** western blots against His-tagged  $\sigma^{54}$  **B)** Coomassie blue staining. Reaction schemes are indicated above. E represents core enzyme RNAP; I, II, III indicate the point when Ocr was added during the reactions. Proteins and DNA concentrations are shown. In lanes 7, 9, 11, a 1:1 molar ratio of Ocr to  $\sigma$  was used, whereas in lane 8, 10, 12, a 4:1 molar ratio of Ocr to  $\sigma$  was used. **C)** Microscale thermophoresis (MST) experiment of Ocr binding to the RNAP- $\sigma^{70}$  holoenzyme, supporting that Ocr competes with sigma in RNAP binding. **D)** MST experiment of RNAP- $\sigma^{70}$  and RNAP- $\sigma^{54}$  binding to promoter DNA with high affinity. The bindings are too tight to give a reliable Kd.
