# Supplementary material for: Structural basis of transcription inhibition by the DNA mimic protein Ocr of bacteriophage T7
Source: eLife journal article supplement (doi:10.7554/elife.52125), 2020-02-10
Supplement: supp [file elife-52125-supp-v1.zip]

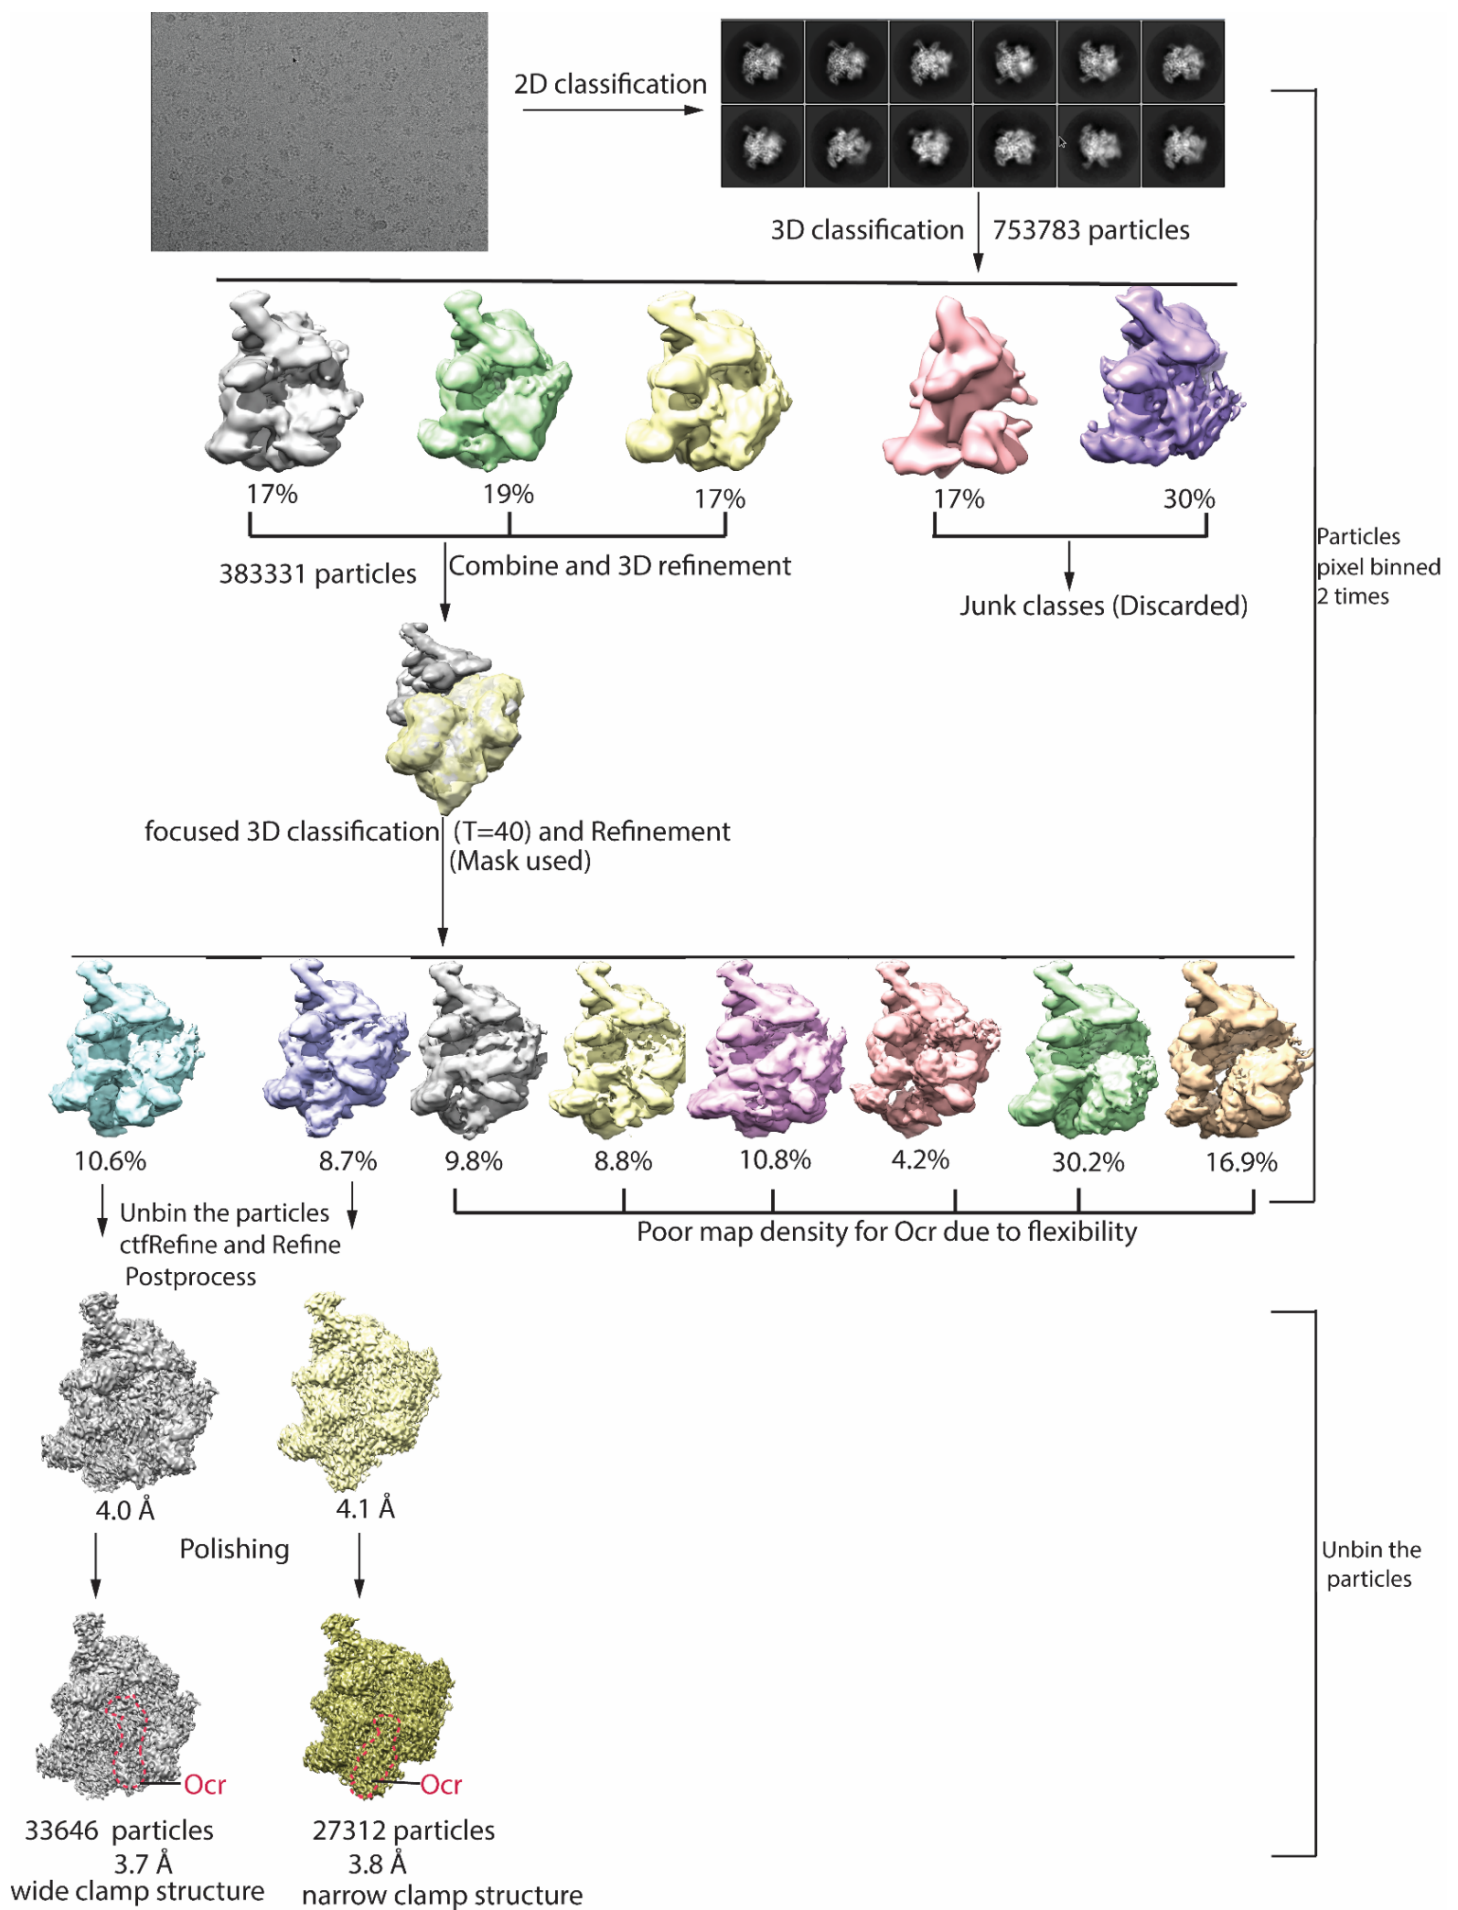

**Figure 2 – figure supplement 1. cryoEM data quality and Image processing flowchart.** Included are a typical micrograph, representative 2D classes and image processing flowchart, and the two distinct RNAP-Ocr complexes obtained.
