# Supplementary material for: Structural basis of transcription inhibition by the DNA mimic protein Ocr of bacteriophage T7
Source: eLife journal article supplement (doi:10.7554/elife.52125), 2020-02-10
Supplement: supp [file elife-52125-supp-v1.zip]

Archive with 10 entries (10 files):
- elife_poa_e52125_Figure_2_figure_supplement_2.pdf
- elife_poa_e52125_Figure_1_figure_supplement_1.pdf
- elife_poa_e52125_Figure_2_figure_supplement_1.pdf
- elife_poa_e52125_Supplementary_file_1.docx
- elife_poa_e52125_Figure_6_figure_supplement_1.pdf
- elife_poa_e52125_Figure_2_figure_supplement_4.pdf
- elife_poa_e52125_Figure_5_figure_supplement_2.pdf
- elife_poa_e52125_Figure_5_figure_supplement_1.pdf
- elife_poa_e52125_Figure_2_figure_supplement_3.pdf
- elife_poa_e52125_Transparent_Reporting_File.docx
