# Supplementary material for: Structural basis of transcription inhibition by the DNA mimic protein Ocr of bacteriophage T7
Source: eLife journal article supplement (doi:10.7554/elife.52125), 2020-02-10
Supplement: supp [file elife-52125-supp-v1.zip]

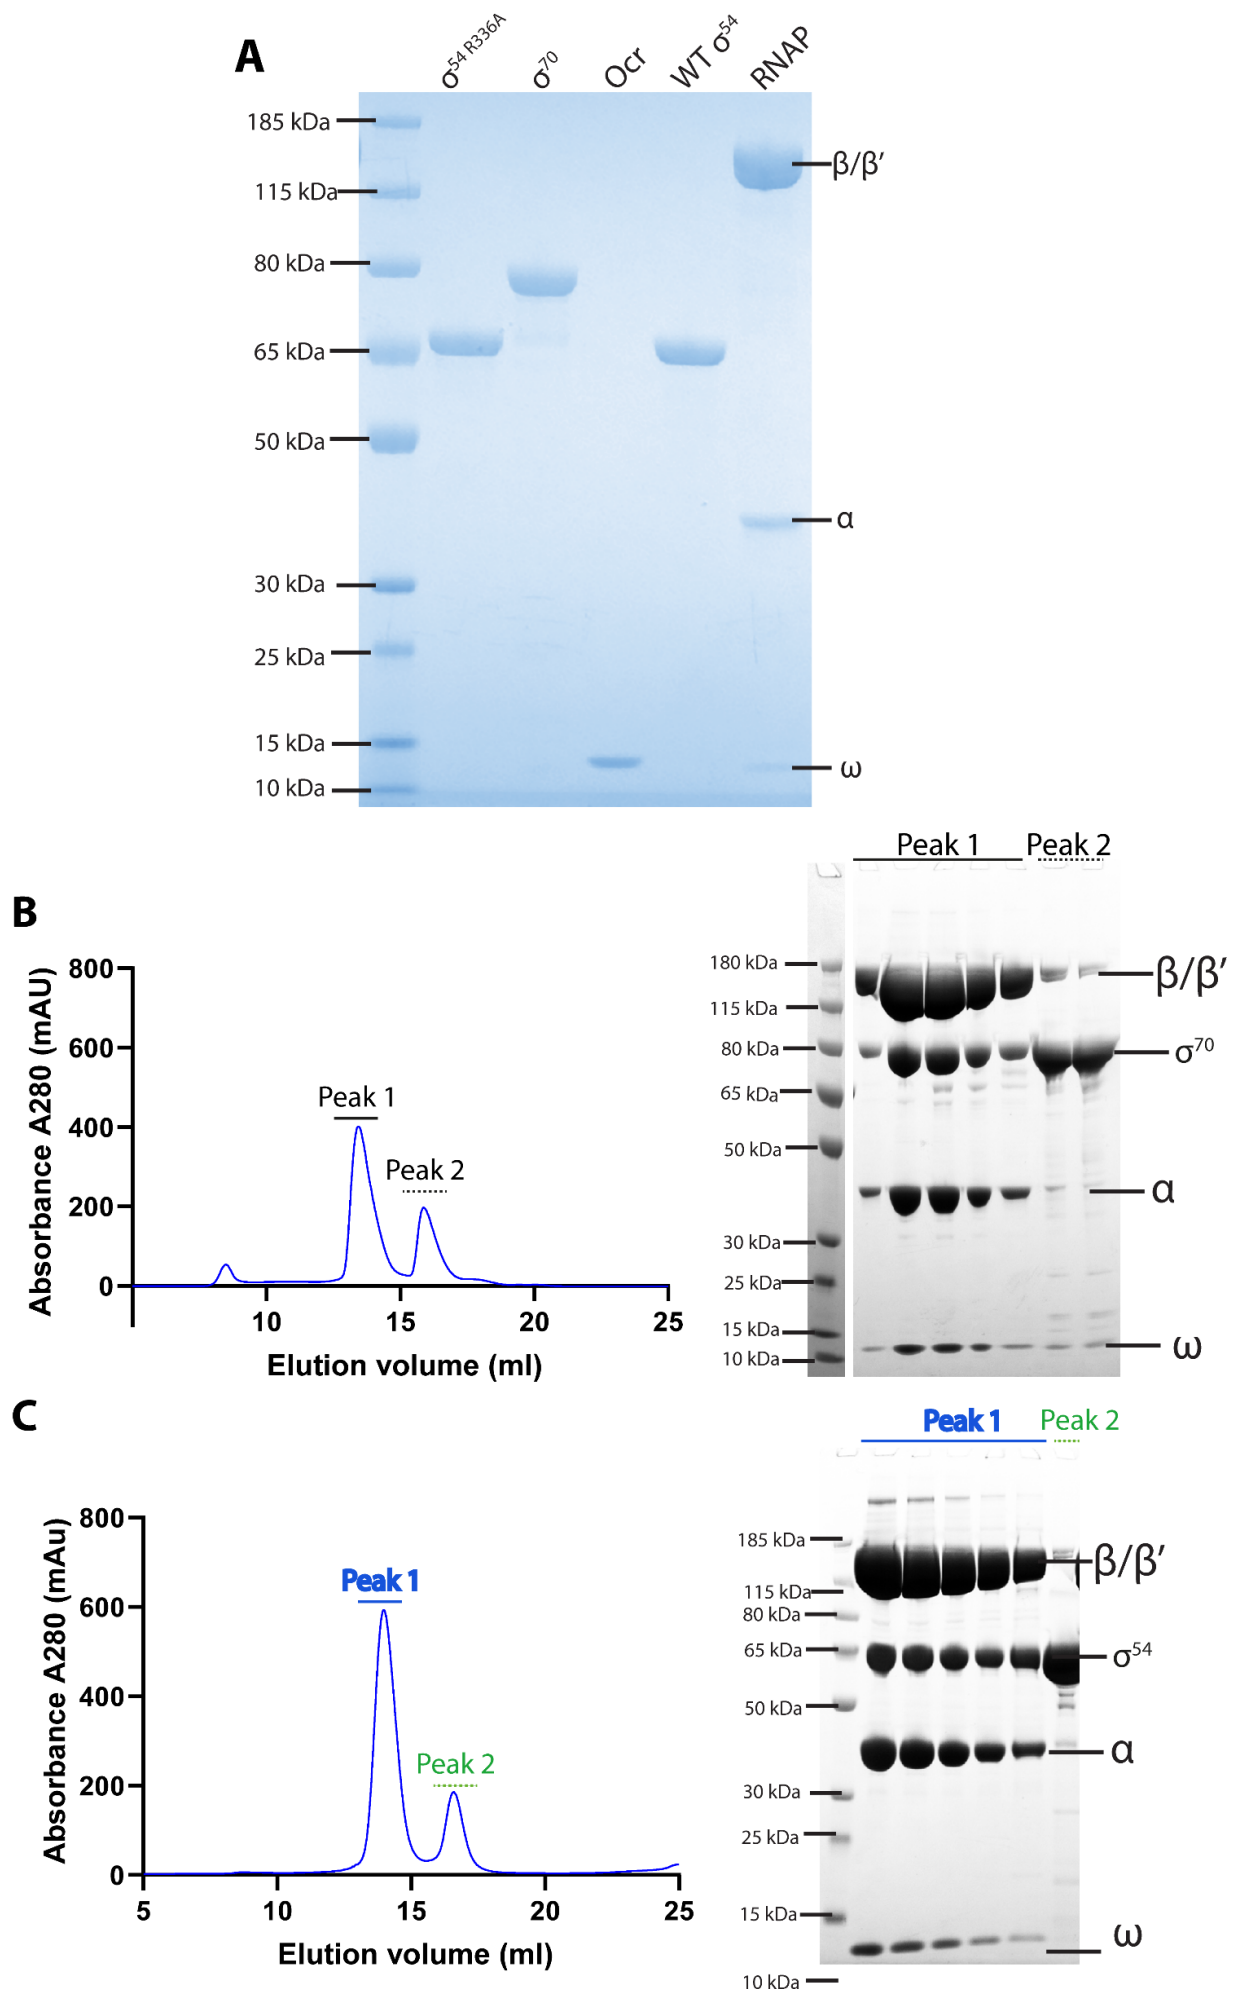

**Figure 1 - figure supplement 1. A)** Quality of proteins used in this study as judged by SDS-PAGE gels. **B-C)** RNAP- $\sigma^{70}$  and RNAP- $\sigma^{54}$  holoenzymes are formed and purified by gel filtration chromatography and assessed by SDS-PAGE.
