# Supplementary material for: Structural basis of transcription inhibition by the DNA mimic protein Ocr of bacteriophage T7
Source: eLife journal article supplement (doi:10.7554/elife.52125), 2020-02-10
Supplement: supp [file elife-52125-supp-v1.zip › elife_poa_e52125_Figure_2_figure_supplement_2.pdf]

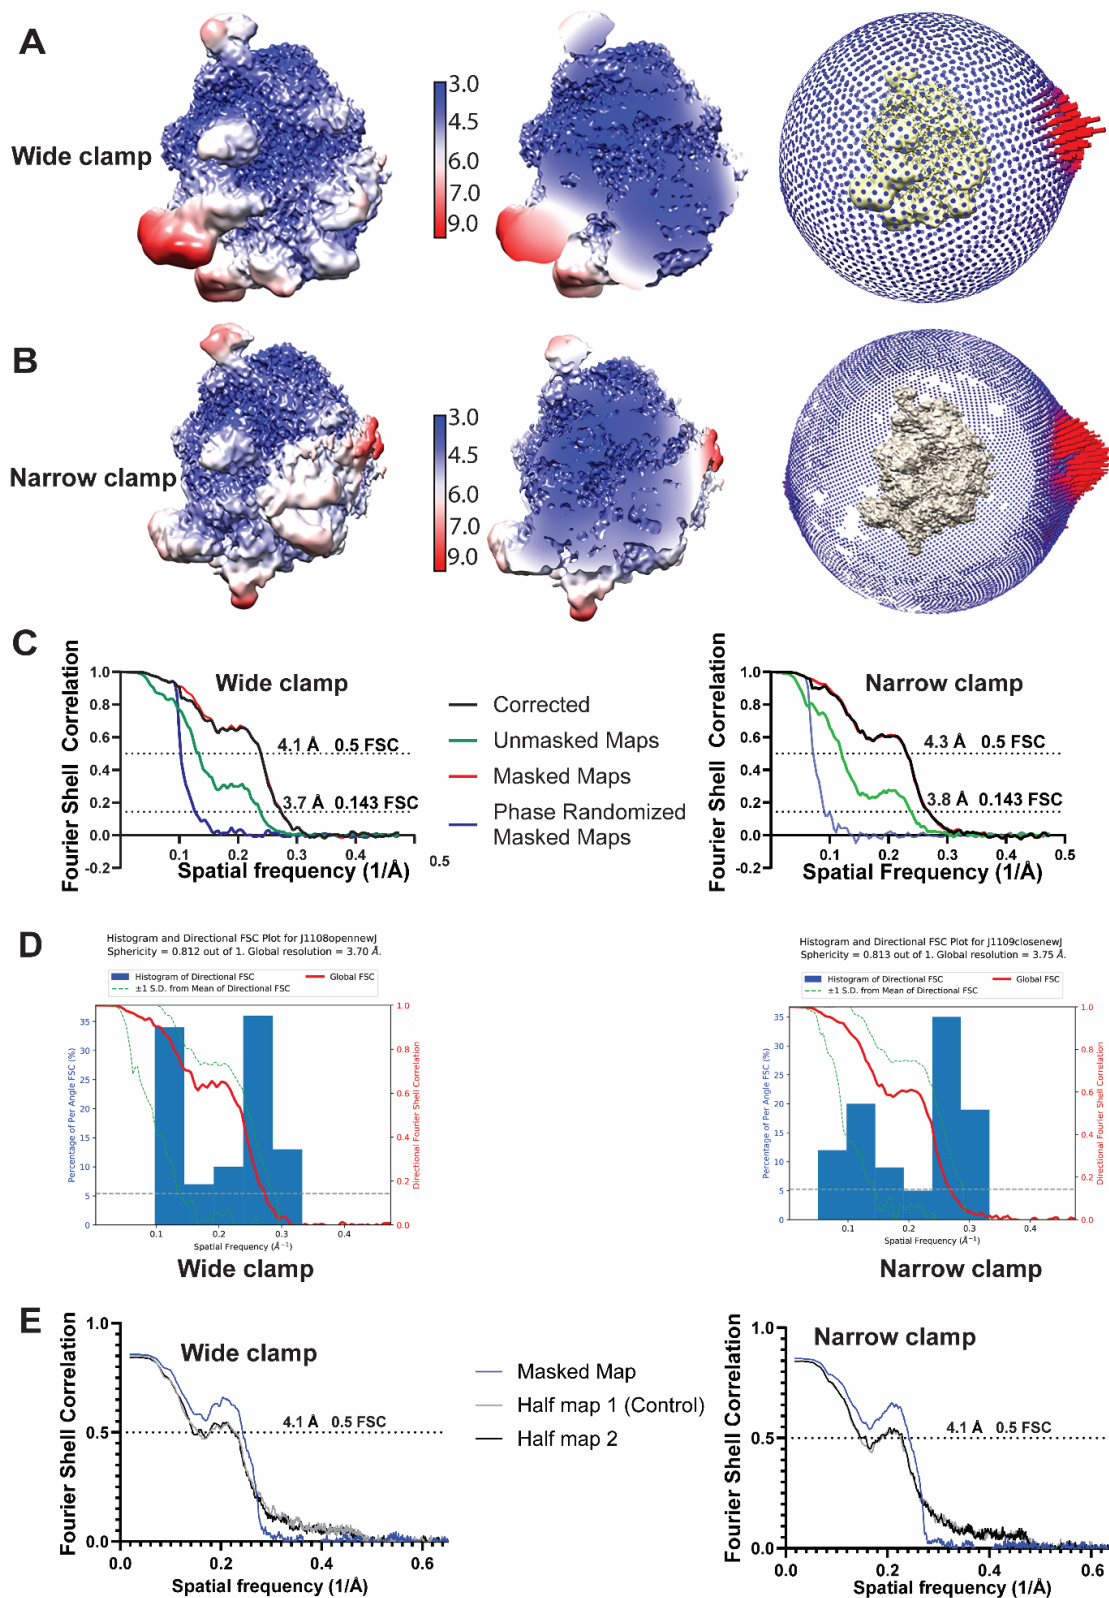

**Figure 2 – figure supplement 2. Quality of the two distinct RNAP-Ocr complex 3D reconstructions.**

A) “wide-clamp” B) “narrow-clamp”. (A) and (B) shows local resolution maps in surface view and cut-through views (separated by resolution indicator), and angular distribution of particles (the extreme right panel of (A) and (B)). C) are the corresponding FSC curves of wide-clamp and narrow-clamp structures including corrected, unmasked, masked and phase randomized masked maps). D) Plots showing the spread of the directional resolutions ( $\pm 1$  S.D, green dotted lines) from the global FSC (red line) and the histogram of directional resolutions (blue bars). Labels on the left Y-axis refer to directional FSC histograms. Labels on the right axis refer to global FSC. The grey dotted line indicates when FSC = 0.143. E) FSC curves of model vs the two half maps. The model is only refined against half map 1.
