# Supplementary material for: Structural basis of transcription inhibition by the DNA mimic protein Ocr of bacteriophage T7
Source: eLife journal article supplement (doi:10.7554/elife.52125), 2020-02-10
Supplement: supp [file elife-52125-supp-v1.zip › elife_poa_e52125_Figure_2_figure_supplement_3.pdf]

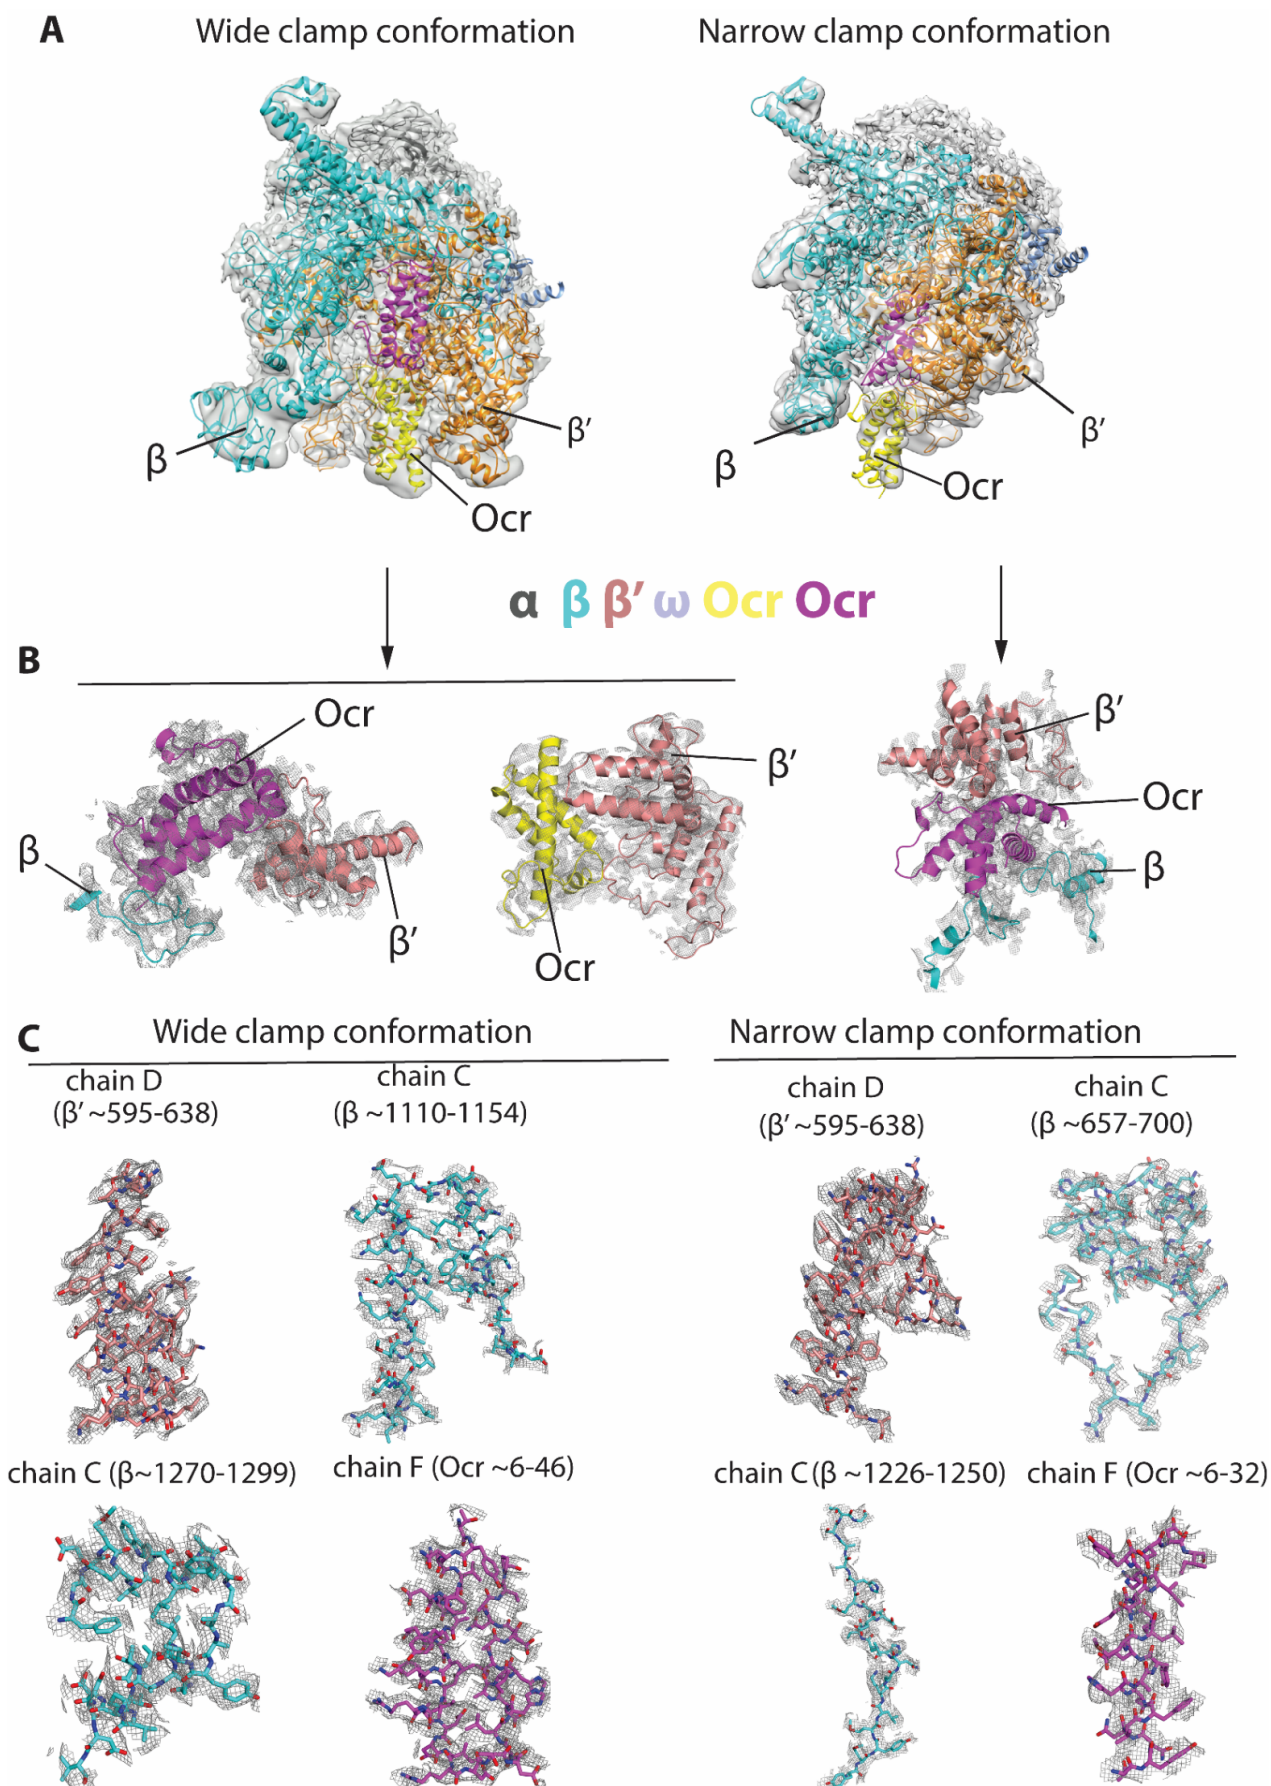

**Figure 2 – figure supplement 3. Representative electron density maps in the two reconstructions. A)** showing overall fit of the atomic structural models into the corresponding reconstructions. Maps are filtered to local resolutions. left panel - wide clamp conformation (global resolution at 3.7 Å), right panels - narrow clamp conformation (global resolution at 3.8 Å). **B)** Views showing structural models of Ocr fitted into the electron density map and the surrounding RNAP. **C).** Well defined regions showing clear density of RNAP and Ocr including side chains.
