# Supplementary material for: Structural basis of transcription inhibition by the DNA mimic protein Ocr of bacteriophage T7
Source: eLife journal article supplement (doi:10.7554/elife.52125), 2020-02-10
Supplement: supp [file elife-52125-supp-v1.zip › elife_poa_e52125_Figure_2_figure_supplement_4.pdf]

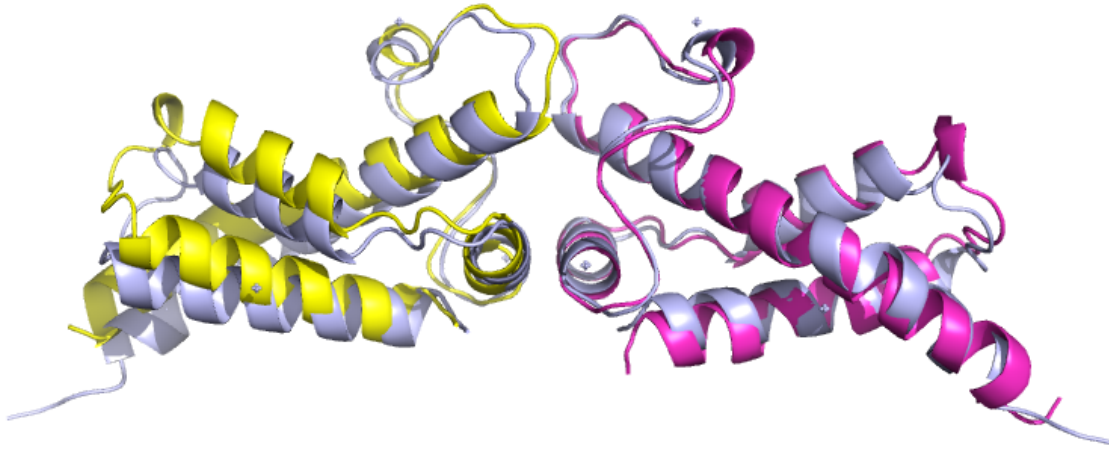

**Figure 2 – figure supplement 4. Structural comparison of Ocr from RNAP-Ocr complex (magenta and yellow) with that from crystal structure (blue, PDB code 1S7Z)**
