# Supplementary material for: Structural basis of transcription inhibition by the DNA mimic protein Ocr of bacteriophage T7
Source: eLife journal article supplement (doi:10.7554/elife.52125), 2020-02-10
Supplement: supp [file elife-52125-supp-v1.zip › elife_poa_e52125_Figure_5_figure_supplement_1.pdf]

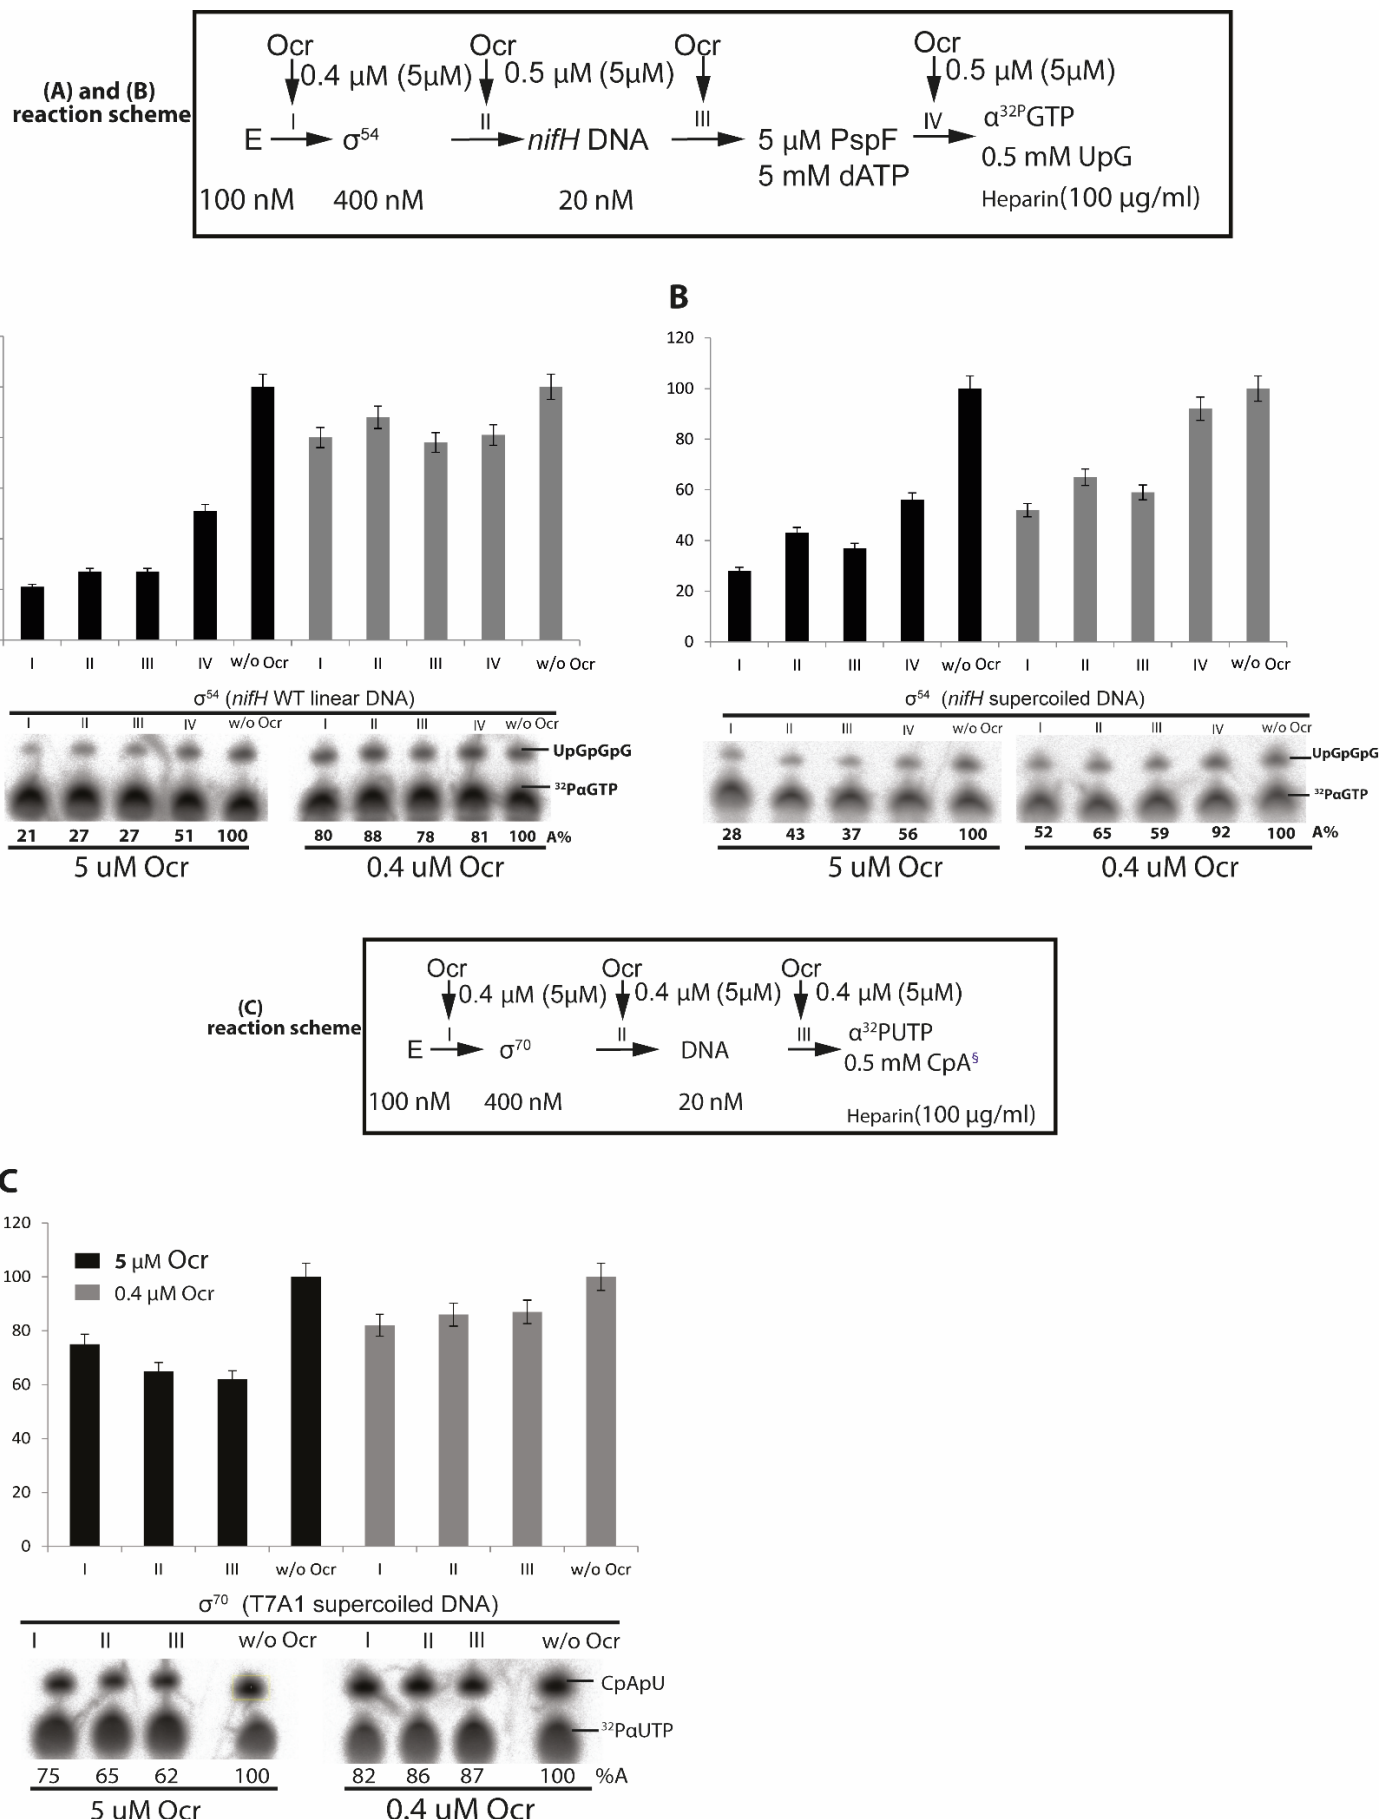

**Figure 5 – figure supplement 1. *In vitro* transcription assays of  $\sigma^{54}$ -dependent systems using linear (A) and supercoiled DNA (B) and  $\sigma^{70}$  transcription using super-coiled DNA (C). Reaction schematics are shown with I, II, III, IV representing experiments when Ocr is added during different stages of transcription initiation reaction. A control lane without Ocr is also shown. Data here show that Ocr can inhibit  $\sigma^{54}$  and  $\sigma^{70}$ -dependent transcription during different stages of initiation and independent of promoters. At least three independent experiments were performed, each with 3-5 technical replicates.**
