# Supplementary material for: Structural basis of transcription inhibition by the DNA mimic protein Ocr of bacteriophage T7
Source: eLife journal article supplement (doi:10.7554/elife.52125), 2020-02-10
Supplement: supp [file elife-52125-supp-v1.zip › elife_poa_e52125_Figure_5_figure_supplement_2.pdf]

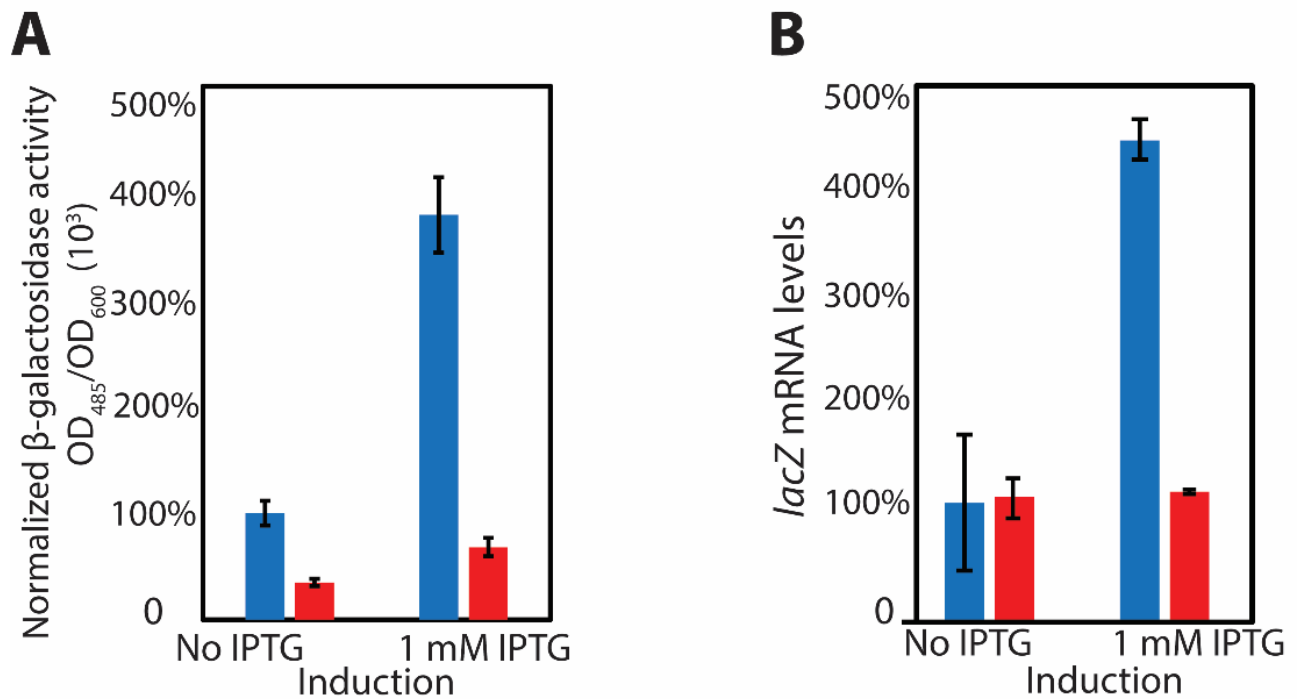

**Figure 5 – figure supplement 2.** *in vivo* data showing Ocr can inhibit transcription. **A**).  $\beta$ -galactosidase activity and **B**) *lacZ* mRNA levels at 15 h post-induction in the presence and absence of Ocr. At least three independent experiments were performed, each with 3-5 technical replicates.
