# Supplementary material for: Structural basis of transcription inhibition by the DNA mimic protein Ocr of bacteriophage T7
Source: eLife journal article supplement (doi:10.7554/elife.52125), 2020-02-10
Supplement: supp [file elife-52125-supp-v1.zip › elife_poa_e52125_Supplementary_file_1.docx]

**Supplementary File 1.** **Pairwise comparisons of *E. coli* cells expressing Ocr (WT/pBAD18cm[*ocr*]) *versus* cells not expressing Ocr (WT/pBAD18cm).**

| Growth Conditions | | | **Growth**  **Inhibition** |
| --- | --- | --- | --- |
| **Growth Medium** | Temperature | Ocr Induction |
| **LB broth (low salt)** | 37oC | - | NO |
| **LB broth (low salt)** | 37oC | 0.02%(w/v) arabinose | NO |
| **LB broth (low salt)** | 37oC | 0.20%(w/v) arabinose | NO |
| **LB broth (low salt)** | 25oC | - | NO |
| **LB broth (low salt)** | 25oC | 0.02%(w/v) arabinose | NO |
| **LB broth (low salt)** | 25oC | 0.20%(w/v) arabinose | NO |
| **LB broth (high salt)** | 37oC | - | NO |
| **LB broth (high salt)** | 37oC | 0.02%(w/v) arabinose | NO |
| **LB broth (high salt)** | 37oC | 0.20%(w/v) arabinose | NO |
| **LB broth (high salt)** | 25oC | - | NO |
| **LB broth (high salt)** | 25oC | 0.02%(w/v) arabinose | NO |
| **LB broth (high salt)** | 25oC | 0.20%(w/v) arabinose | NO |
| **Nutrient broth** | 37oC | - | NO |
| **Nutrient broth** | 37oC | 0.02%(w/v) arabinose | NO |
| **Nutrient broth** | 37oC | 0.20%(w/v) arabinose | NO |
| **Nutrient broth** | 25oC | - | NO |
| **Nutrient broth** | 25oC | 0.02%(w/v) arabinose | NO |
| **Nutrient broth** | 25oC | 0.20%(w/v) arabinose | NO |
| **Modified M9 medium** | 37oC | - | YES |
| **Modified M9 medium** | 37oC | 0.02%(w/v) arabinose | YES |
| **Modified M9 medium** | 37oC | 0.20%(w/v) arabinose | YES |
| **Modified M9 medium** | 25oC | - | YES |
| **Modified M9 medium** | 25oC | 0.02%(w/v) arabinose | YES |
| **Modified M9 medium** | 25oC | 0.20%(w/v) arabinose | YES |
